# Supplementary material for: Reduction of the P5A-ATPase Spf1p phosphoenzyme by a Ca2+-dependent phosphatase
Source: PubMed Central journal article supplement (PMC7192388; doi:10.1371/journal.pone.0232476), 2020-04-30

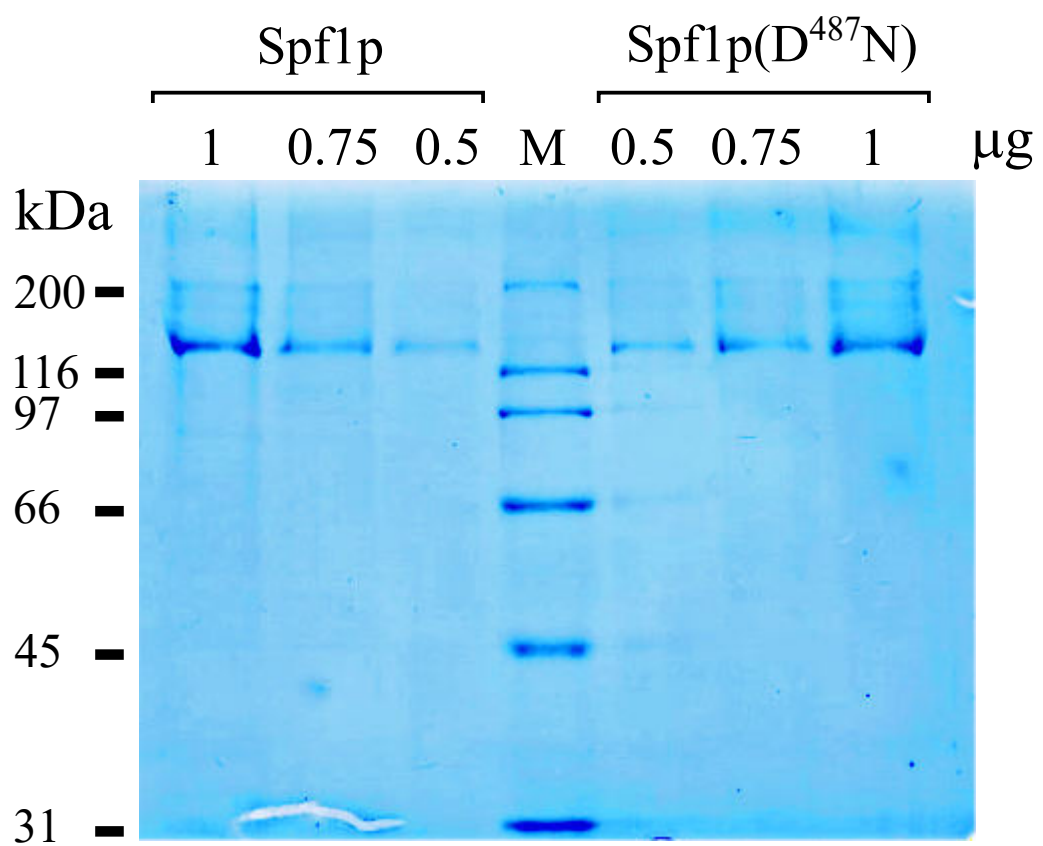

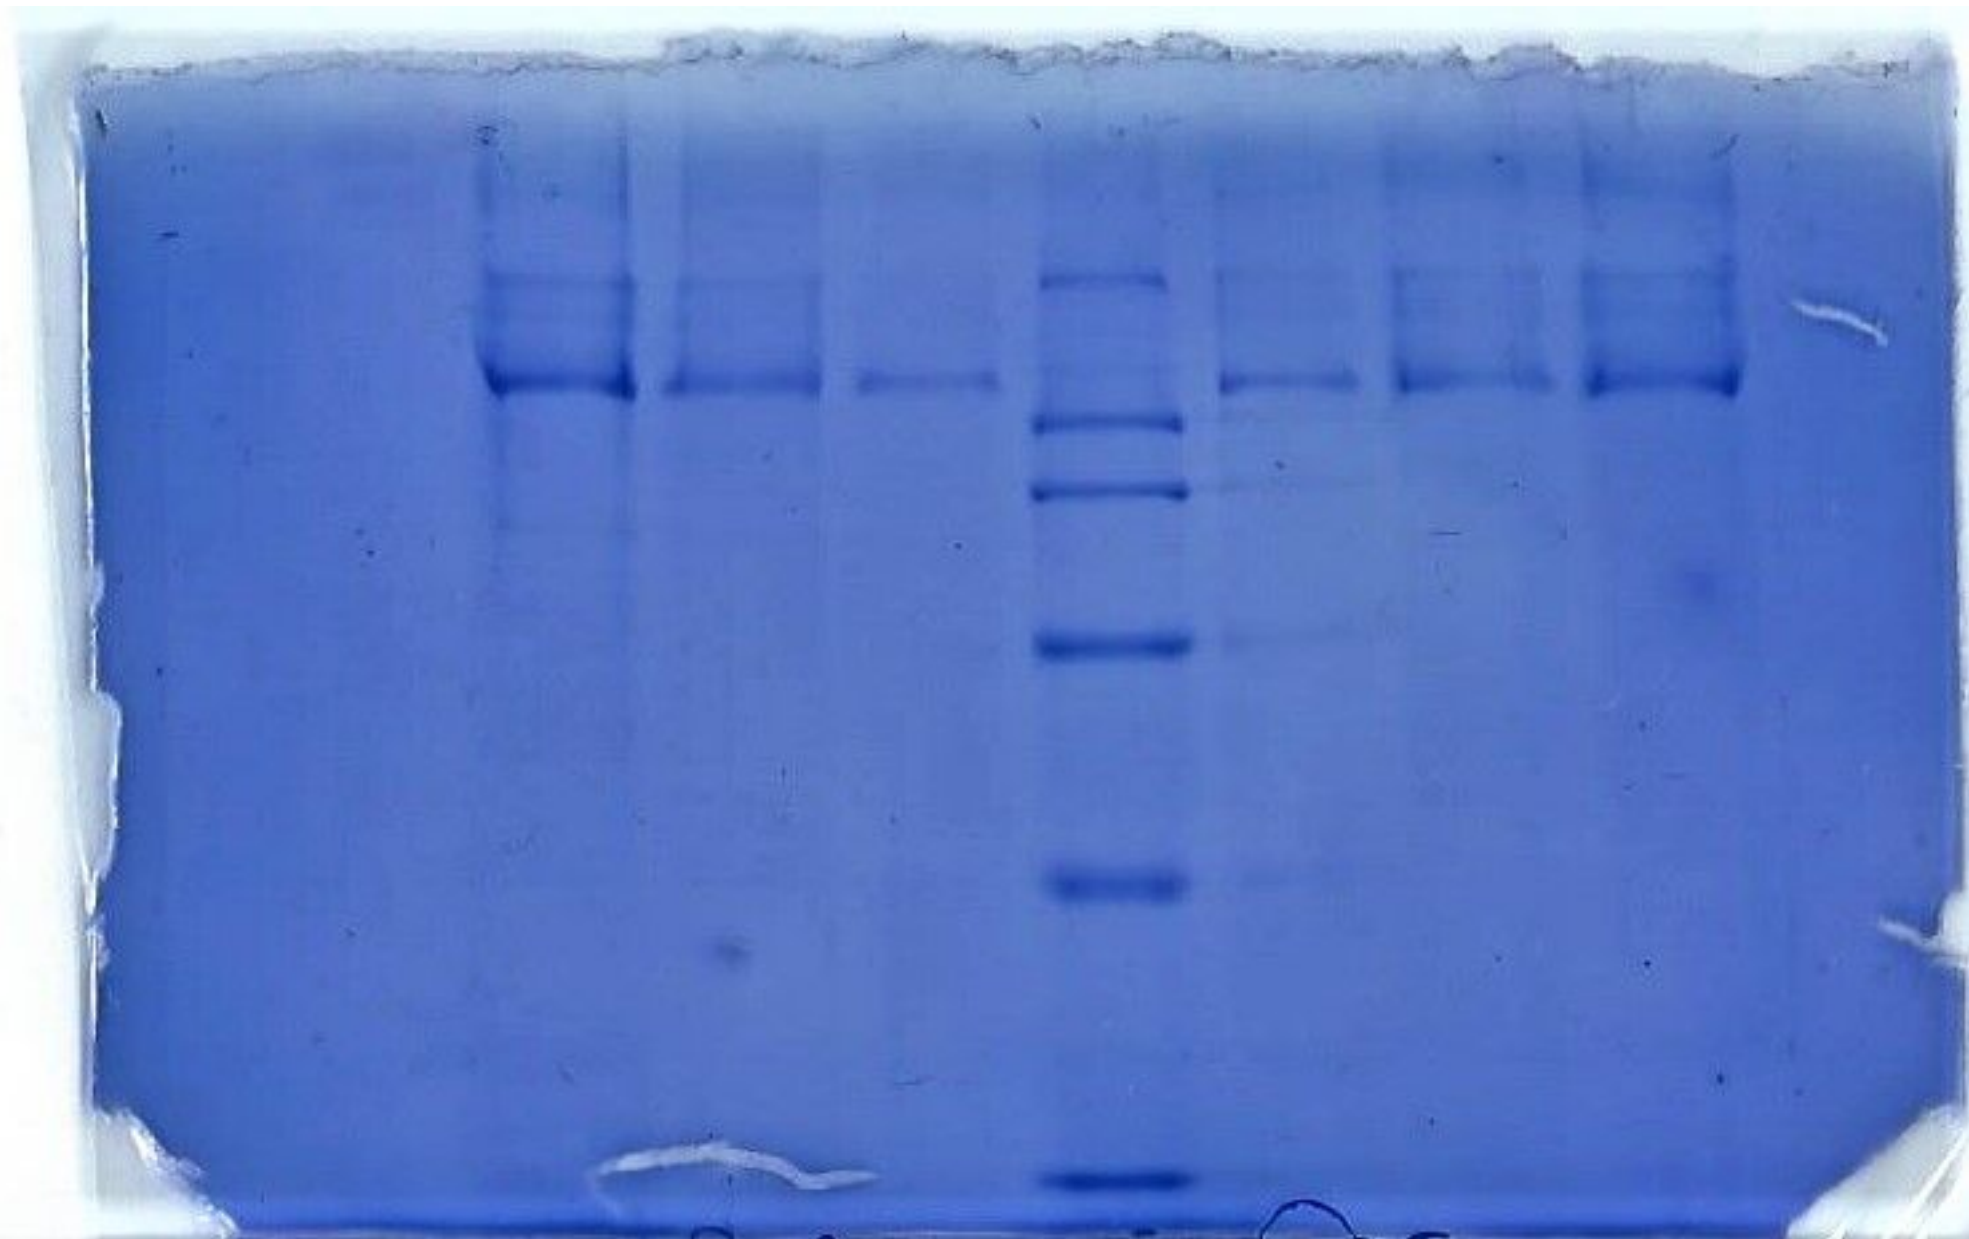

figure 1.tiff

Figure 4

A

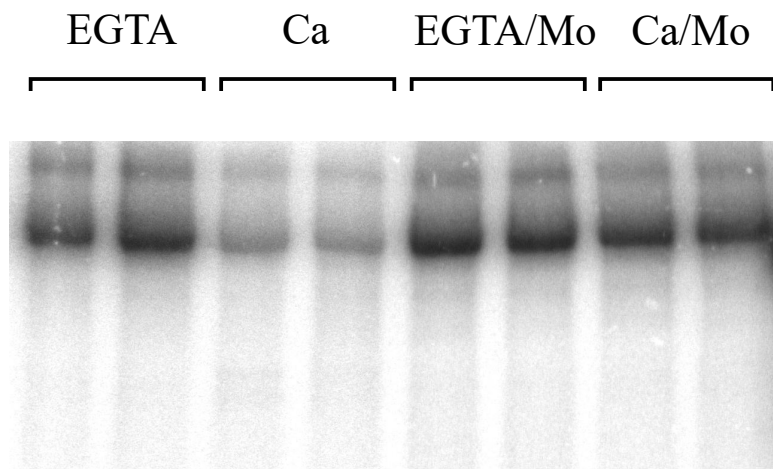

B

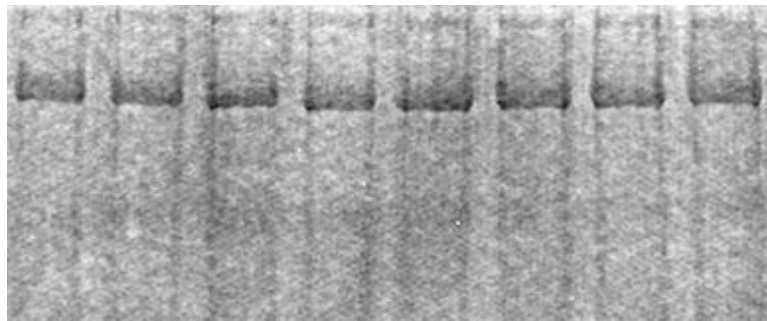

C

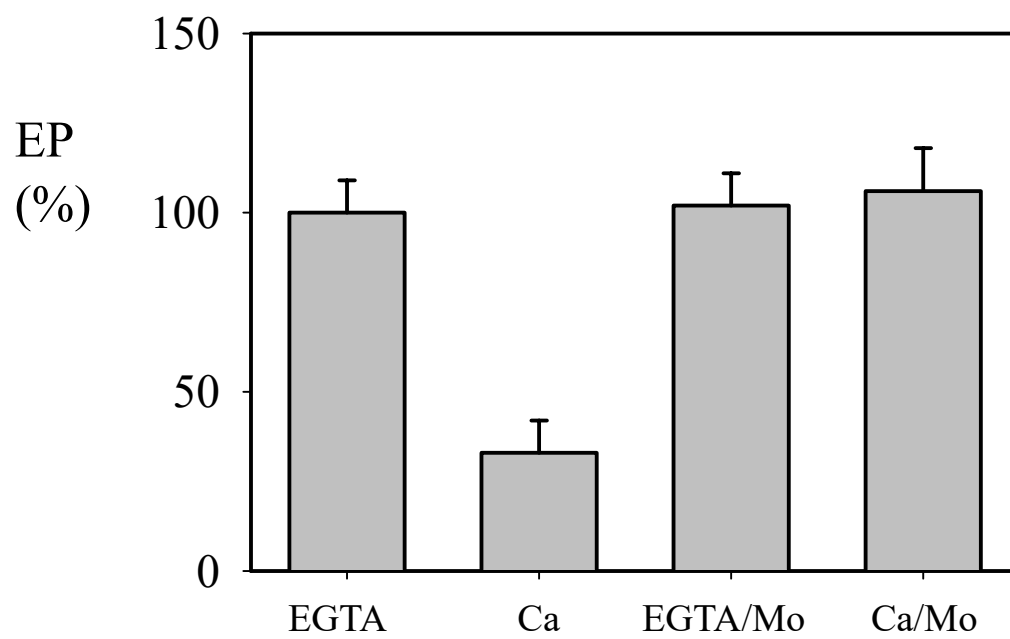

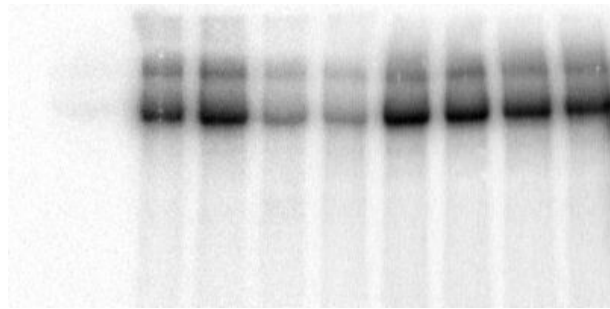

figure 4a.tif

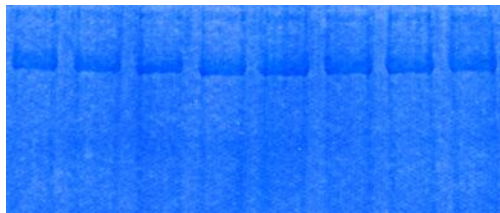

figure 4b.tif

Figure 6

A

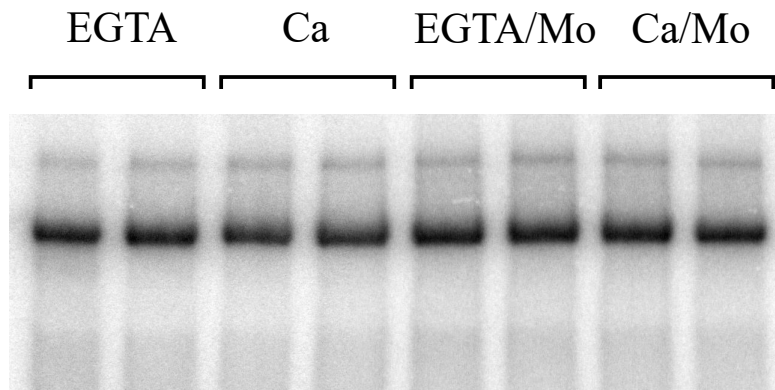

B

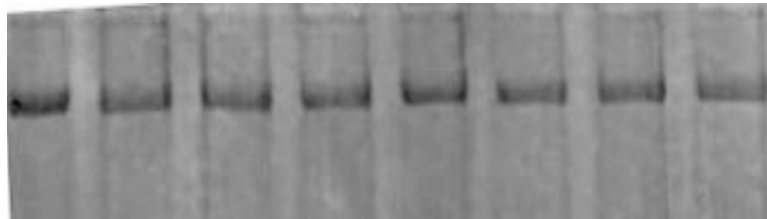

C

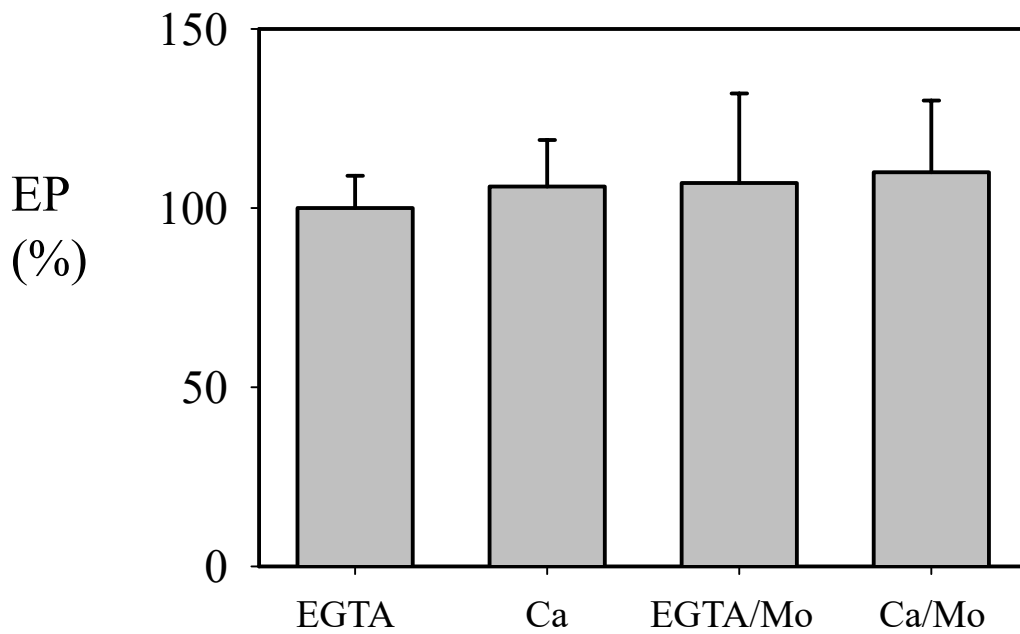

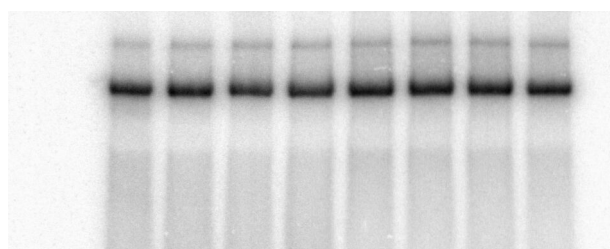

figure 6a.tif

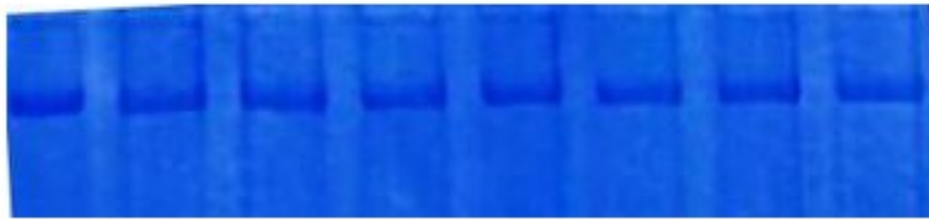

figure 6b.tif



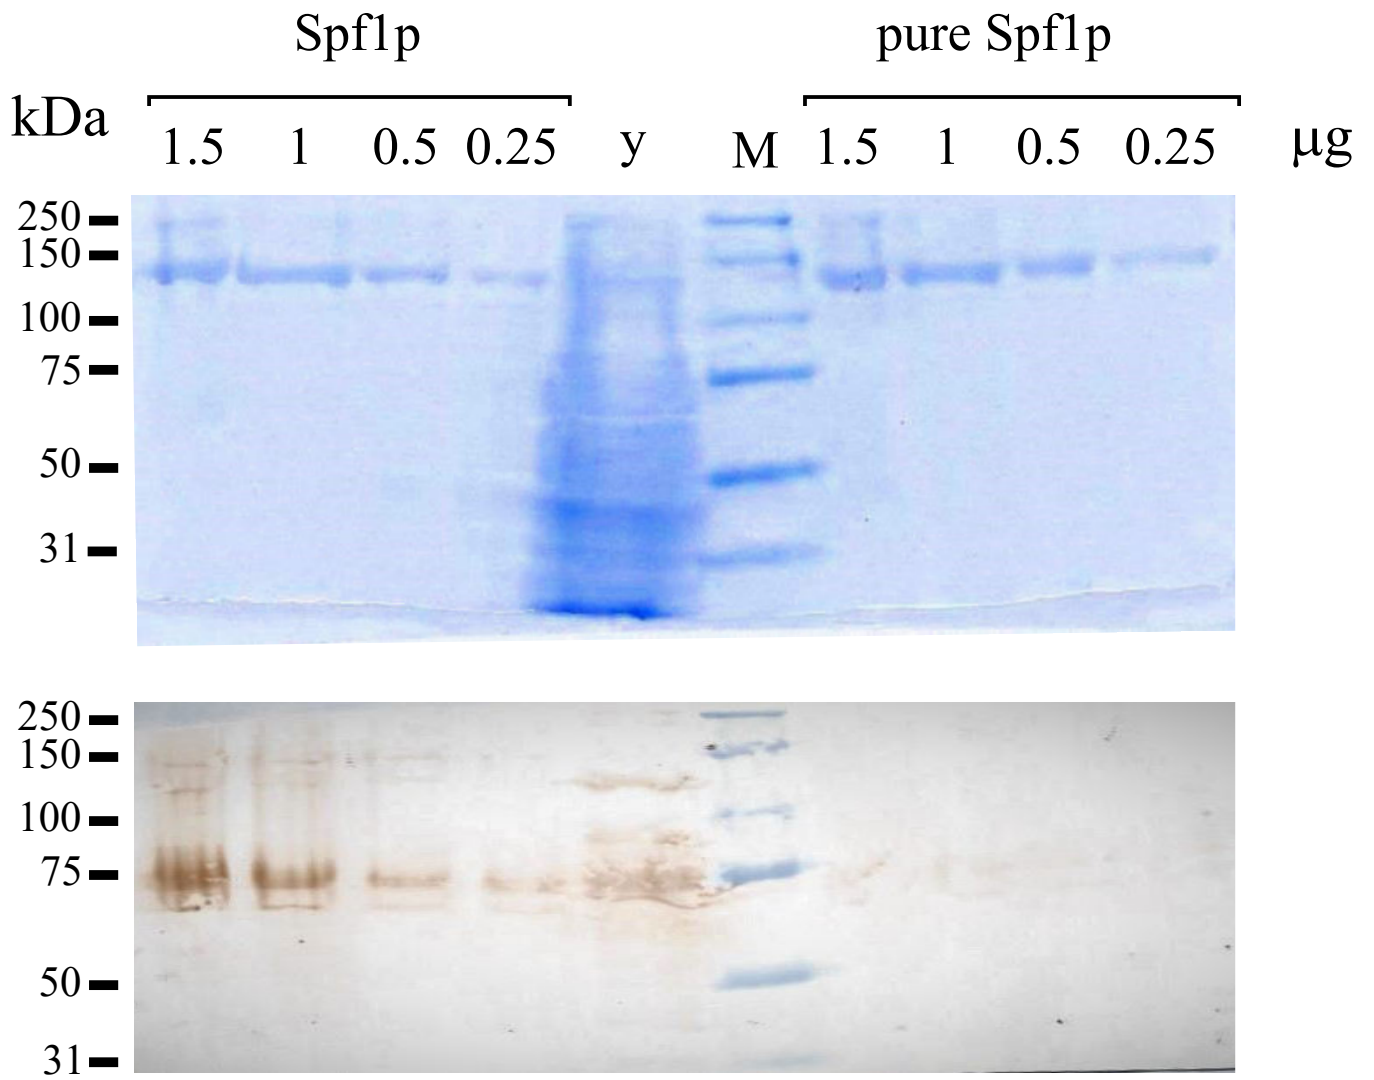

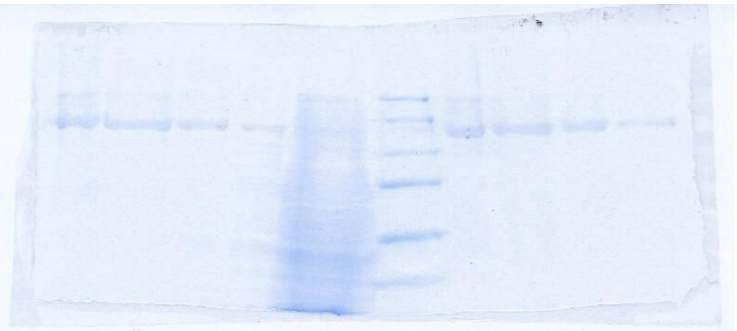

figure 7a.tif

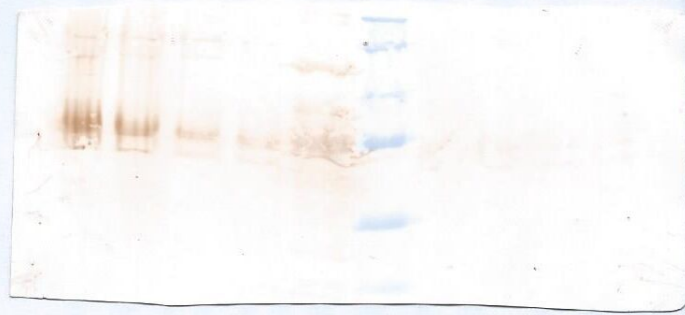

Supplement: pone.0232476.s001.pdf [file pone.0232476.s001.pdf]
